# Supplementary material for: Fe-TiO2/AC and Co-TiO2/AC Composites: Novel Photocatalysts Prepared from Waste Streams for the Efficient Removal and Photocatalytic Degradation of Cibacron Yellow F-4G Dye
Source: MDPI journal article supplement (doi:10.3390/catal11101137), 2021-09-23
Supplement: s1 [file s1]

# **Fe-TiO<sub>2</sub>/AC and Co-TiO<sub>2</sub>/AC composites: novel photocatalysts prepared from waste streams for an efficient removal and photocatalytic degradation of Cibacron Yellow F-4G dye.**

Roberto Machado Garcia <sup>a</sup>, Robert Carleer <sup>b</sup>, Maria Arada Pérez <sup>a</sup>, Jeamichel Puente Torres <sup>c</sup>, Ying Gu <sup>d</sup>, Pieter Samyn <sup>b</sup>, Jan Yperman <sup>b\*</sup>

<sup>a</sup> Department of Chemistry, Universidad de Oriente, Patricio Lumumba s/n, CU-90 100 Santiago de Cuba, Cuba. [robertomg@uo.edu.cu](mailto:robertomg@uo.edu.cu), [mayarada@uo.edu.cu](mailto:mayarada@uo.edu.cu)

<sup>b</sup> Research group of Analytical and Circular Chemistry, University Hasselt, Agoralaan, Gebouw D, BE-3590 Diepenbeek, Belgium. [jan.yperman@uhasselt.be](mailto:jan.yperman@uhasselt.be), [robert.carleer@uhasselt.be](mailto:robert.carleer@uhasselt.be), [pieter.samyn@uhasselt.be](mailto:pieter.samyn@uhasselt.be)

<sup>c</sup> Faculty of Electrical Engineering, Universidad de Oriente, CU-90-100 Santiago de Cuba, Cuba. [jeamichelp@gmail.com](mailto:jeamichelp@gmail.com)

<sup>d</sup> Zhejiang Ocean University, Zhoushan 316022, China. [guying@hust.edu.cn](mailto:guying@hust.edu.cn)

## ***1. pH at the point of zero charge (pH<sub>PZC</sub>)***

In brief, 50 mg of sample were mixed in every bottle with 50 mL of 0.01 M NaCl solutions at various (2–10) initial pH (pH<sub>i</sub>) during 24 h in a shaking bath. Afterwards, the pH of the solution (pH<sub>f</sub>) was determined. The final (pH<sub>f</sub>) and initial (pH<sub>i</sub>) pH difference ( $\Delta\text{pH} = \text{pH}_f - \text{pH}_i$ ) was calculated and plotted versus pH<sub>i</sub>. The pH<sub>PZC</sub> of the adsorbent is found where the resulting curve intersects the value of  $\Delta\text{pH} = 0$ .

## ***2. Batch equilibrium studies***

In brief, 25 mL of synthetic CYF-4G dye solution with an initial pH=2 and different concentrations (from 50 to 350 mg/L) was added to each flask with 0.03 g of adsorbent/photocatalyst at 25°C and during 24 h in a shaking bath. After the adsorption, the dye solution was filtered using a 14 A filter paper. The dye concentration of each sample before and after adsorption was measured using a Biochrom Ultrospec 9000 UV-VIS spectrophotometer at  $\lambda_{\text{max}} = 420 \text{ nm}$

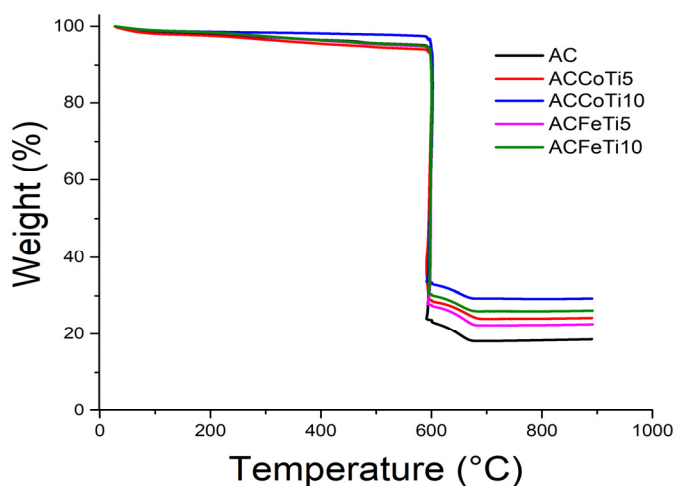

**Figure S1.** TG curves of AC, ACCoTi5, ACCoTi10, ACFeTi5 and ACFeTi10.

**Table S1.** Proximate analysis of AC, Fe-TiO<sub>2</sub>/AC and Co-TiO<sub>2</sub>/AC composites.

| Samples  | Proximate analysis (wt. %)* |      |       |            |                           |                           |
|----------|-----------------------------|------|-------|------------|---------------------------|---------------------------|
|          | MC                          | VM   | FC    | Ash 900 °C | CO <sub>2</sub> mass loss | CaCO <sub>3</sub> content |
| AC       | 1.56                        | 2.03 | 74.48 | 17.19      | 4.74                      | 10.77                     |
| ACFeTi5  | 1.37                        | 3.62 | 68.04 | 22.55      | 4.42                      | 10.05                     |
| ACFeTi10 | 1.32                        | 3.45 | 64.25 | 26.72      | 4.26                      | 9.679                     |
| ACCoTi5  | 1.82                        | 4.82 | 64.57 | 24.15      | 4.64                      | 10.54                     |
| ACCoTi10 | 0.98                        | 2.53 | 63.01 | 29.30      | 4.18                      | 9.50                      |

MC is moisture content, VM is volatile matter, FC is fixed carbon, \*error on proximate analysis is 5 %.

**Table S2.** Elemental analysis

| Samples  | Elemental analysis (%) |      |      |     |       |      | Molar Ratio |       |
|----------|------------------------|------|------|-----|-------|------|-------------|-------|
|          | C                      | H    | N    | S   | Ash   | O*   | H/C         | O/C   |
| AC       | 73.80                  | 1.04 | 0.75 | <DL | 17.19 | 7.22 | 0.014       | 0.098 |
| ACFeTi5  | 67.20                  | 0.74 | 0.61 | <DL | 22.55 | 8.90 | 0.011       | 0.132 |
| ACFeTi10 | 62.36                  | 0.81 | 0.63 | <DL | 26.72 | 9.48 | 0.012       | 0.152 |
| ACCoTi5  | 65.90                  | 0.72 | 0.59 | <DL | 24.25 | 8.54 | 0.011       | 0.129 |
| ACCoTi10 | 59.80                  | 0.58 | 0.66 | <DL | 29.3  | 9.66 | 0.010       | 0.162 |

\*Calculated by difference. O%= 100% - (C%+N%+H%+S%+ash%); b on dry basis. DL= detection limit.

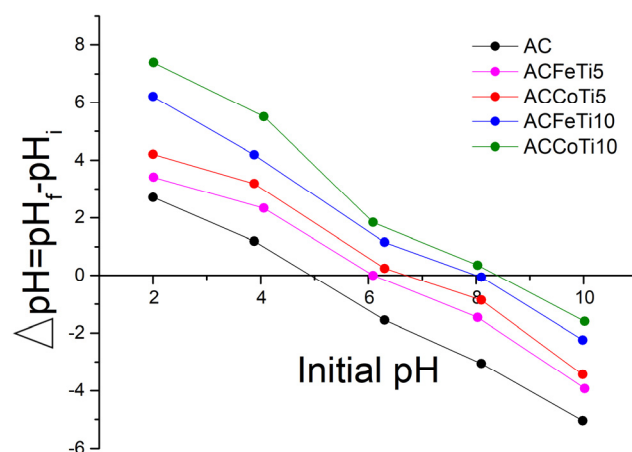

**Figure S2.** Point of zero charge measurements for AC, ACCoTi5, ACCoTi10, ACFeTi5 and ACFeTi10.

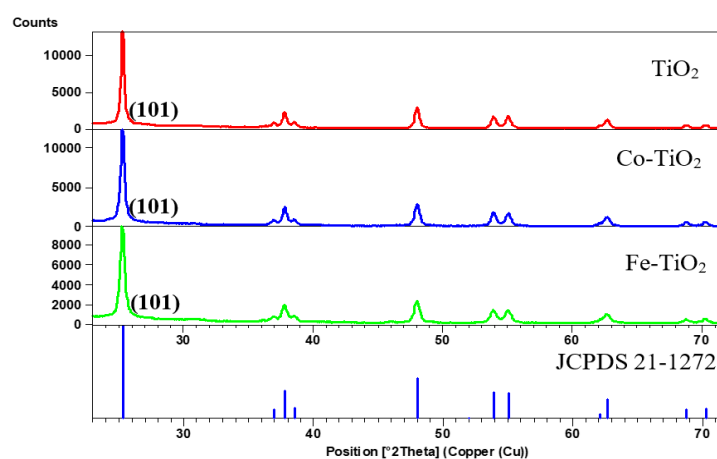

**Figure S3.** X-ray diffraction patterns of TiO<sub>2</sub>, 0.5 wt.% Co-doped and 1 wt.% Fe-doped TiO<sub>2</sub>.

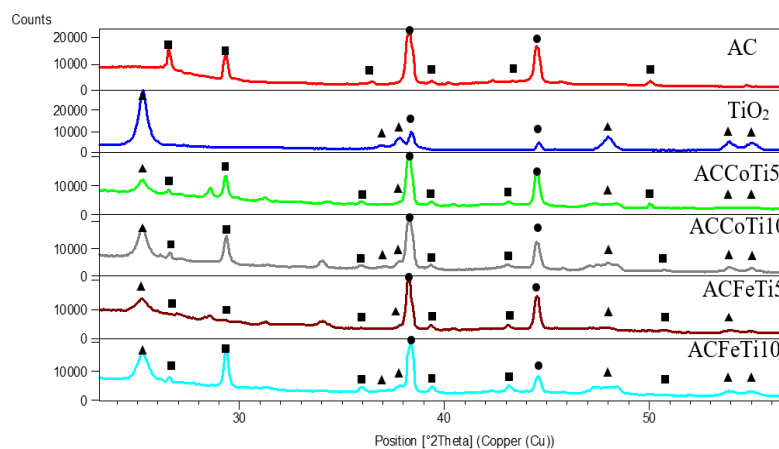

**Figure S4.** X-ray diffraction patterns of AC, TiO<sub>2</sub>, ACCoTi5, ACCoTi10, ACFeTi5 and ACFeTi10. Peak labelling corresponds to the following: ■ AC; ▲ Anatase and ● Al peaks (from sample holder).

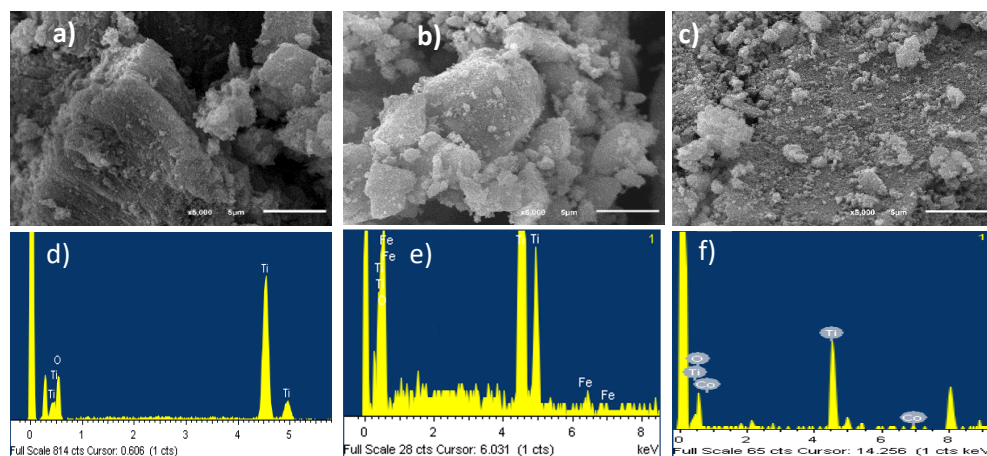

**Figure S5.** Scanning electron microscopy images of: a)  $\text{TiO}_2$ , b)  $\text{Fe-TiO}_2$  and c)  $\text{Co-TiO}_2$  and EDS spectra of d)  $\text{TiO}_2$ , e)  $\text{Fe-TiO}_2$  and f)  $\text{Co-TiO}_2$ .

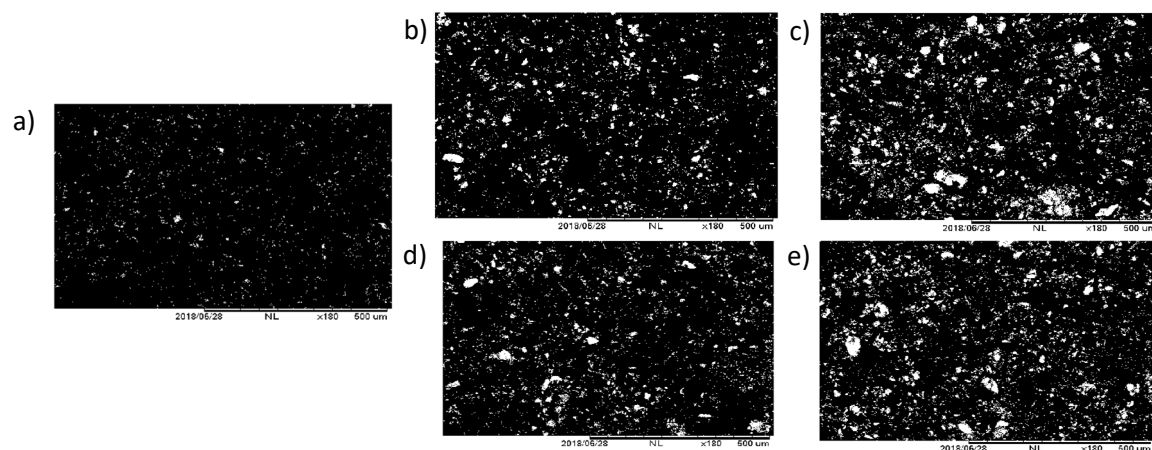

**Figure S6.** Black and white binary images a) AC, b) ACFeTi5, c) ACFeTi10, d) ACCoTi5 and e) ACCoTi10.

**Table S3.** Ash content (wt.%) and total number of pixels (TOP) in "1" binarized SEM images.

| Sample   | Ash content (TGA) | TOP in "1" binarized SEM images | R <sup>2</sup> |
|----------|-------------------|---------------------------------|----------------|
| AC       | 17.19             | $2.6 \times 10^4$               | 0.999          |
| ACFeTi5  | 22.55             | $4.2 \times 10^4$               |                |
| ACFeTi10 | 26.72             | $5.6 \times 10^4$               |                |
| ACCoTi5  | 24.15             | $4.4 \times 10^4$               | 0.986          |
| ACCoTi10 | 29.3              | $5.9 \times 10^4$               |                |

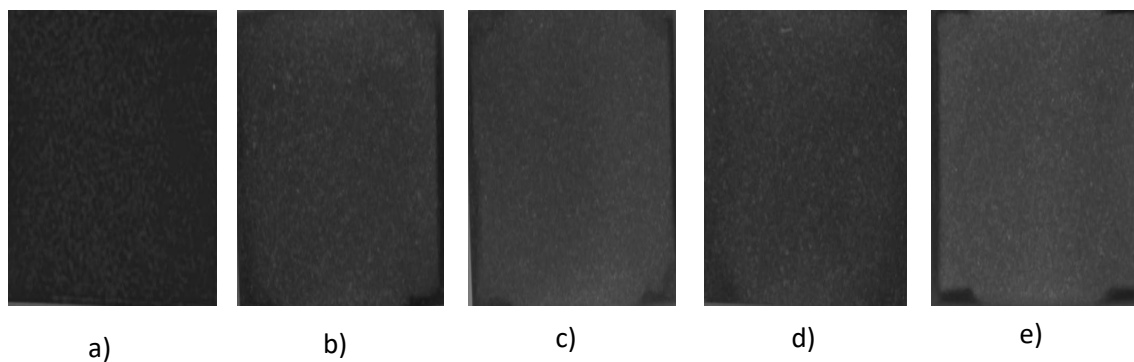

**Figure S7.** Digital radiographic images of a) AC, b) ACFcTi5, c) ACFcTi10, d) ACCoTi5 and e) ACCoTi10.

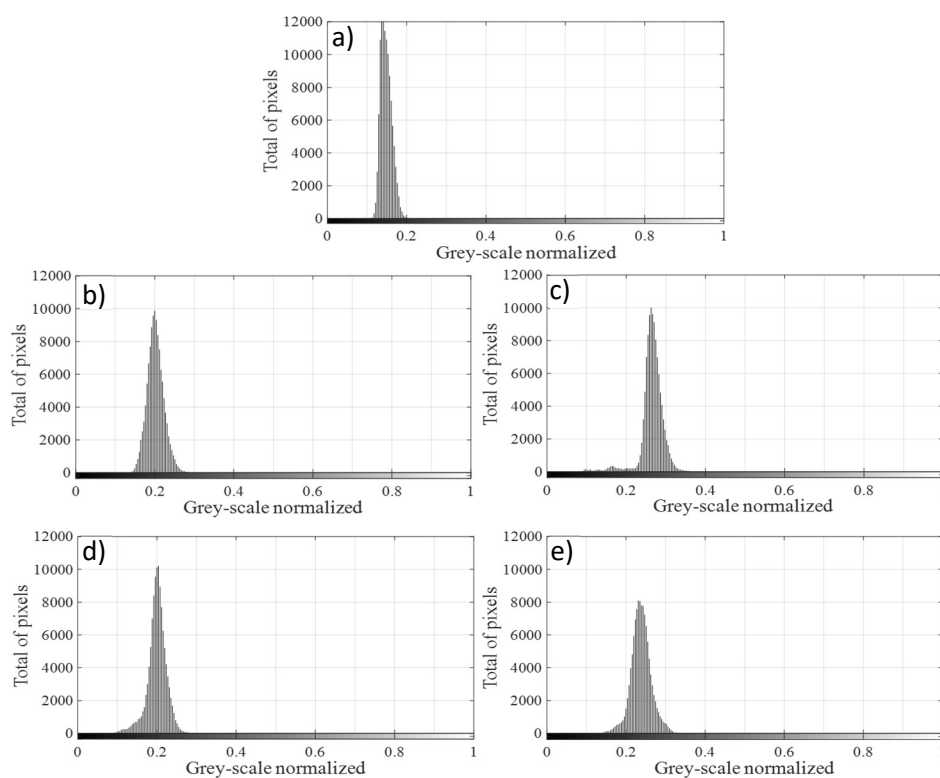

**Figure S8.** Image histograms of: a) AC, b) ACFcTi5, c) ACFcTi10, d) ACCoTi5 and e) ACCoTi10.

**Table S4.** Thermally stable inorganic fraction (ash) in wt.(%) and GSI values of attenuated photons.

| Sample   | Ash content (TGA) | GSI values | R <sup>2</sup> |
|----------|-------------------|------------|----------------|
| AC       | 17.19             | 0.1373     | 0.999          |
| ACFcTi5  | 22.55             | 0.1901     |                |
| ACFcTi10 | 26.72             | 0.2314     |                |
| ACCoTi5  | 24.15             | 0.2091     | 0.986          |
| ACCoTi10 | 29.3              | 0.2627     |                |

**Table S5.** Kinetic parameters for the adsorption of CYF-4G on AC, ACFeTi5, ACFeTi10, ACCoTi5 and ACCoTi10.

| Kinetic models                   | AC    | ACFeTi5 | ACFeTi10 | ACCoTi5 | ACCoTi10 |
|----------------------------------|-------|---------|----------|---------|----------|
| $q_e$ , exp. (mg/g)              | 61.14 | 50.86   | 35.36    | 39.46   | 26.37    |
| <b>Pseudo-first order (PFO)</b>  |       |         |          |         |          |
| $k_1$ (1/min)* $10^{-2}$         | 1.133 | 1.281   | 2.117    | 1.192   | 0.924    |
| $q_e$ (mg/g)                     | 69.44 | 56.67   | 37.43    | 47.82   | 33.65    |
| $R^2$                            | 0.977 | 0.961   | 0.889    | 0.963   | 0.983    |
| RMSE                             | 1.884 | 1.915   | 1.663    | 1.782   | 0.846    |
| <b>Pseudo-second order (PSO)</b> |       |         |          |         |          |
| $k_2$ (g/mg min)* $10^{-4}$      | 1.941 | 2.913   | 8.716    | 2.725   | 2.123    |
| $q_e$ (mg/g)                     | 60.37 | 48.79   | 34.79    | 39.45   | 26.66    |
| $R^2$                            | 0.986 | 0.991   | 0.942    | 0.991   | 0.996    |
| RMSE                             | 1.468 | 0.921   | 1.205    | 0.869   | 0.438    |
| <b>Elovich</b>                   |       |         |          |         |          |
| $\alpha$ (mg/g min)              | 1.909 | 2.167   | 6.855    | 1.046   | 0.444    |
| $\beta$ (mg/g)* $10^{-2}$        | 6.508 | 8.657   | 17.33    | 8.871   | 11.35    |
| $R^2$                            | 0.935 | 0.879   | 0.705    | 0.911   | 0.959    |
| RMSE                             | 3.191 | 3.311   | 2.713    | 2.757   | 1.323    |

**Table S6.** Kinetic parameters for intraparticle diffusion model.

| Weber-Morris Parameters             | AC    | ACCoTi5 | ACCoTi10 | ACFeTi5 | ACFeTi10 |
|-------------------------------------|-------|---------|----------|---------|----------|
| <b>First step</b>                   |       |         |          |         |          |
| $k_{1p}$ (mg/g min <sup>1/2</sup> ) | 3.14  | 2.59    | 1.55     | 2.95    | 2.25     |
| $C_1$ (mg/g)                        | 9.47  | 2.51    | 0.413    | 4.69    | 0.323    |
| $R^2$                               | 0.999 | 0.999   | 0.997    | 0.999   | 0.996    |
| <b>Second step</b>                  |       |         |          |         |          |
| $k_{2p}$ (mg/g min <sup>1/2</sup> ) | 1.64  | 0.874   | 0.852    | 1.48    | 0.906    |
| $C_2$ (mg/g)                        | 29.28 | 24.85   | 10.72    | 25.27   | 18.67    |
| $R^2$                               | 0.932 | 0.998   | 0.997    | 0.983   | 0.883    |
| <b>Third step</b>                   |       |         |          |         |          |
| $k_{3p}$ (mg/g min <sup>1/2</sup> ) | 0.174 | 0.144   | 0.264    | 0.326   | 0.069    |
| $C_3$ (mg/g)                        | 54.33 | 38.25   | 20.69    | 43.74   | 33.58    |
| $R^2$                               | 0.828 | 0.773   | 0.628    | 0.986   | 0.928    |

**Table S7.** Comparison of the coefficient isotherm parameters for CYF-4G adsorption.

| Parameters              | AC    | ACCoTi5 | ACCoTi10 | ACFeTi5 | ACFeTi10 |
|-------------------------|-------|---------|----------|---------|----------|
| $Q_{max}^0$ exp. (mg/g) | 309.1 | 244.6   | 192.2    | 255.4   | 203.6    |
| <b>Langmuir</b>         |       |         |          |         |          |
| $Q_{max}^0$ (mg/g)      | 333.7 | 246.4   | 189.2    | 258.4   | 201.1    |
| $K_L$ (L/mg)* $10^{-2}$ | 5.689 | 16.64   | 28.02    | 6.406   | 26.82    |
| $R^2$                   | 0.954 | 0.944   | 0.953    | 0.981   | 0.933    |
| RMSE                    | 16.84 | 12.99   | 7.731    | 7.549   | 9.695    |
| <b>Freundlich</b>       |       |         |          |         |          |
| $1/n$                   | 0.252 | 0.174   | 0.152    | 0.231   | 0.157    |
| $K_F$ (mg/g)            | 83.67 | 66.16   | 88.91    | 73.78   | 92.67    |
| $R^2$                   | 0.946 | 0.938   | 0.914    | 0.951   | 0.884    |
| RMSE                    | 18.29 | 13.57   | 10.57    | 11.86   | 12.72    |
| <b>Temkin</b>           |       |         |          |         |          |
| $K_T$ (L/g)             | 1.97  | 13.6    | 23.1     | 2.84    | 16.3     |
| $b$ (kJ/mol)* $10^{-2}$ | 1.93  | 3.07    | 4.28     | 2.61    | 3.83     |
| $R^2$                   | 0.952 | 0.836   | 0.867    | 0.858   | 0.879    |
| RMSE                    | 17.22 | 22.18   | 13.04    | 20.15   | 13.11    |

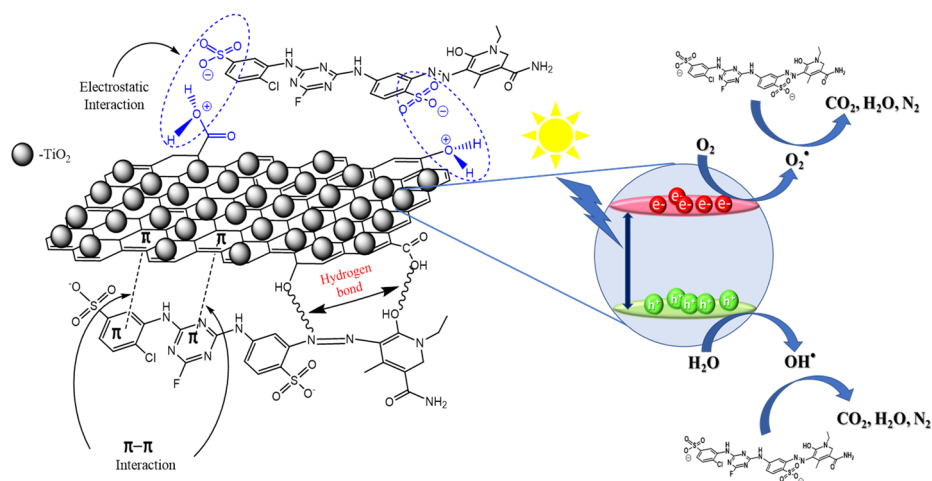

**Figure S9.** Schematic illustration of visible light photocatalytic degradation mechanism using M-TiO<sub>2</sub>/AC photocatalyst. M= Co or Fe. [1] after modification.

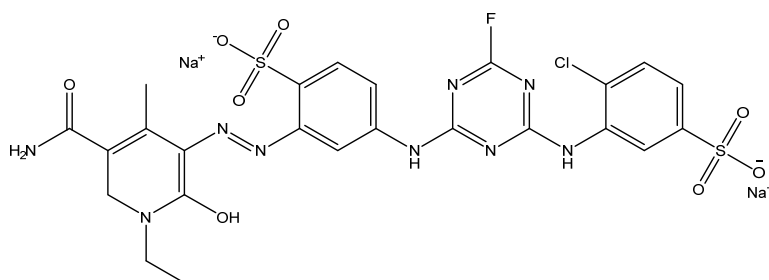

**Figure S10.** Structure of CYF-4G sodium salt.

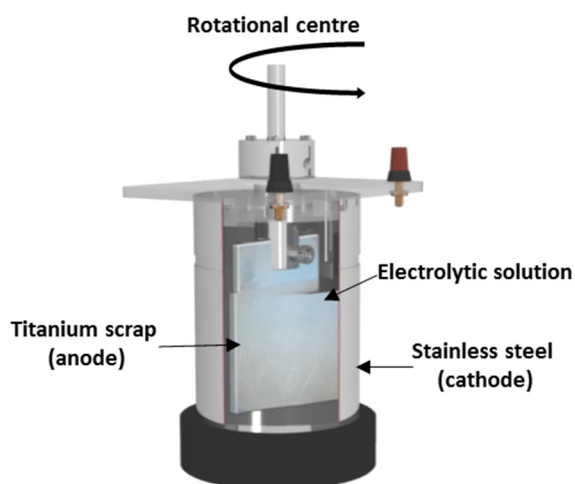

**Figure S11.** Experimental cell for the electrolytic preparation of nanosized TiO<sub>2</sub>.

### 3. References

1. Machado Garcia, R.; Carleer, R.; Arada Pérez, M.; Gryglewicz, G.; Maggen, J.; Haeldermans, T.; Yperman, J. Adsorption of Cibacron Yellow F-4G dye onto activated carbons obtained from peanut hull and rice husk: kinetics and equilibrium studies. *Biomass Conversion and Biorefinery* **2020**, 1-17, doi:<https://doi.org/10.1007/s13399-020-00699-w>.
